# Supplementary material
Source: publisher site journal article supplement (https://www.spandidos-publications.com/778/downloadSupplementary)
Supplement: Supplementary file 1 [file downloadSupplementary]

Table SXI. GO analysis for mRNAs in hsa\_circ\_0000977-microRNA-mRNA axis.

| ID         | Description                                                                                                         | GeneRatio | P-value  |
|------------|---------------------------------------------------------------------------------------------------------------------|-----------|----------|
| GO:0000982 | Transcription factor activity, RNA polymerase II proximal promoter sequence-specific DNA binding                    | 22/283    | 1.12E-06 |
| GO:0035035 | Histone acetyltransferase binding                                                                                   | 6/283     | 5.80E-06 |
| GO:0000987 | Proximal promoter sequence-specific DNA binding                                                                     | 21/283    | 1.46E-05 |
| GO:0001228 | Transcriptional activator activity, RNA polymerase II transcription regulatory region sequence-specific DNA binding | 20/283    | 1.53E-05 |
| GO:0001047 | Core promoter binding                                                                                               | 10/283    | 0.000104 |
| GO:0001077 | Transcriptional activator activity, RNA polymerase II proximal promoter sequence-specific DNA binding               | 14/283    | 0.000184 |
| GO:0000978 | RNA polymerase II proximal promoter sequence-specific DNA binding                                                   | 18/283    | 0.000269 |
| GO:0005112 | Notch binding                                                                                                       | 4/283     | 0.000385 |
| GO:0042826 | Histone deacetylase binding                                                                                         | 8/283     | 0.000386 |
| GO:0070491 | Repressing transcription factor binding                                                                             | 6/283     | 0.000571 |
| GO:0004842 | Ubiquitin-protein transferase activity                                                                              | 17/283    | 0.000967 |
| GO:0008022 | Protein C-terminus binding                                                                                          | 10/283    | 0.001016 |
| GO:0034450 | Ubiquitin-ubiquitin ligase activity                                                                                 | 3/283     | 0.001053 |
| GO:0000980 | RNA polymerase II distal enhancer sequence-specific DNA binding                                                     | 6/283     | 0.001324 |

GO, Gene Ontology; circ, circular RNA; hsa, Homo sapiens.
